# Supplementary material
Source: PubMed Central journal article supplement (PMC1839993)
Supplement: NIHMS16073-supplement.pdf [file NIHMS16073-supplement.pdf]

## 8 Appendix

TO THE EDITOR: THE APPENDIX IS INTENDED TO BE AN ELECTRONIC FILE, NOT INCLUDED WITH THE PAPER VERSION. IS THIS WORKABLE FOR TAS?

Figure 5: Code to install and run Amelia and Zelig

```
1  install.packages("Amelia",repos="http://gking.harvard.edu")
2  source("http://gking.harvard.edu/zelig/install.R")
3  library(Amelia)
4  library(Zelig)
5  AmeliaView()
6  ds1 <- read.csv("outdata1.csv")
7  ds2 <- read.csv("outdata2.csv")
8  ds3 <- read.csv("outdata3.csv")
9  ds4 <- read.csv("outdata4.csv")
10 ds5 <- read.csv("outdata5.csv")
11 ds6 <- read.csv("outdata6.csv")
12 ds7 <- read.csv("outdata7.csv")
13 ds8 <- read.csv("outdata8.csv")
14 ds9 <- read.csv("outdata9.csv")
15 ds10 <- read.csv("outdata10.csv")
16 z.out <- zelig(as.factor(ROUTINE) ~ AGE + as.factor(ATYPE) +
17   AWEKEND + FEMALE + LOS + NDX + as.factor(RACE) +
18   TOTCHG + as.factor(NSEASON), model="logit",
19   data = mi(ds1,ds2,ds3,ds4,ds5,ds6,ds7,ds8,ds9,ds10))
```

Figure 6: Code to read and analyze Amelia datasets within SAS

```
1 %macro readin(n);
2 data imp&n;
3 infile "c:\projects\kid\ame_out_&n..csv" delimiter = ',';
4 input AGE AWEEKEND FEMALE LOS NDX RACE TOTCHG ROUTINE NEWATYPE NSEASON;
5 _imputation_ = &n;
6 run;
7 %mend readin;
8
9 %macro rall;
10 %do j = 1 %to 10;
11 %readin(&j);
12 %end;
13 %mend;
14
15 %rall;
16
17 data Amelia;
18 set imp1 imp2 imp3 imp4 imp5 imp6 imp7 imp8 imp9 imp10;
19 run;
20
21 proc sort data = amelia; by _imputation_; run;
22
23 proc logistic data = amelia descending ;
24     by _imputation_;
25     class routine race aweekend nseason female newatype/param = glm;
26     model routine = age race aweekend nseason female newatype los totchg ndx/covb;
27     ods output ParameterEstimates=kidsparms CovB=kidsscovb;
28 run;
29
30 data kp2;
31 set kidsparms;
32     if df ne 0;
33     if classval0 ne '' then variable = compress(variable||classval0);
34 run;
35
36 proc mianalyze parms=kp2 covb(effectvar=stacking)=kidsscovb;
37     modeleffects Intercept age race1 race2 race3 aweekend0
38     nseason1 nseason2 nseason3 female0
39     newatype1 newatype2 los totchg ndx;
40 run;
```

Figure 7: Screenshot of Amelia

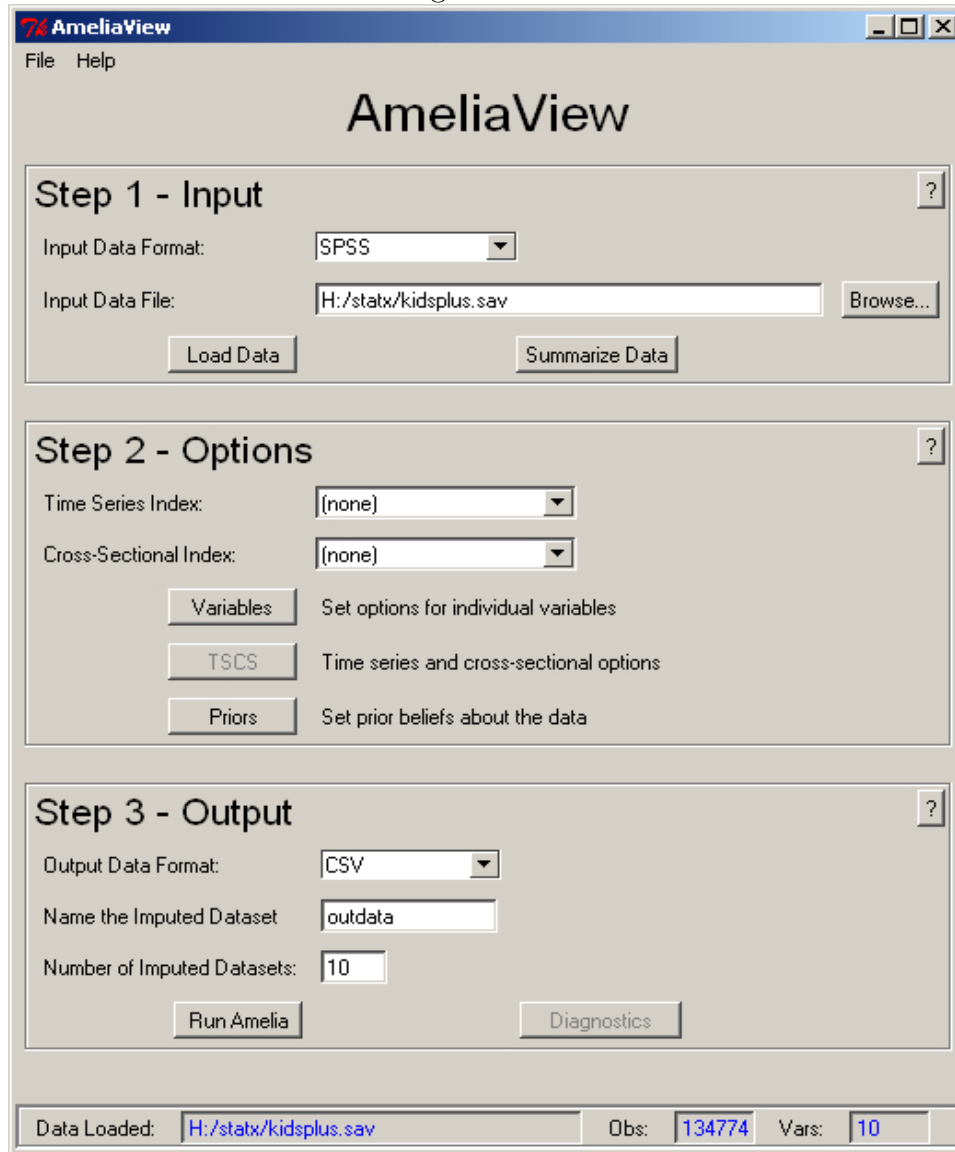

Figure 8: Output from Zelig

```
> summary(z.out)
Model: logit
Number of multiply imputed data sets: 10

Combined results:
Call:
zelig(formula = as.factor(ROUTINE) ~ AGE + as.factor(ATYPE) +
      AWEEKEND + FEMALE + LOS + NDX + as.factor(RACE) + TOTCHG +
      as.factor(NSEASON), model = "logit", data = mi(ds1, ds2,
      ds3, ds4, ds5, ds6, ds7, ds8, ds9, ds10))

Coefficients:
                Value Std. Error  t-stat  p-value
(Intercept)      2.759e+00  5.554e-02  49.6723  0.000e+00
AGE              -3.810e-02  3.015e-03 -12.6341  1.374e-36
as.factor(ATYPE)2  2.871e-01  1.915e-02  14.9889  1.254e-44
as.factor(ATYPE)3  3.303e-01  2.489e-02  13.2728  2.865e-34
AWEEKEND         -2.677e-02  1.962e-02  -1.3644  1.724e-01
FEMALE           1.033e-01  1.584e-02   6.5216  6.956e-11
LOS              -2.880e-03  7.144e-04  -4.0319  5.550e-05
NDX              -1.058e-01  3.723e-03 -28.4276  9.734e-178
as.factor(RACE)2  -6.592e-02  2.381e-02  -2.7684  6.039e-03
as.factor(RACE)3  -1.163e-01  2.667e-02  -4.3621  1.641e-05
as.factor(RACE)4  -7.256e-02  3.880e-02  -1.8704  6.446e-02
TOTCHG           -4.743e-06  5.408e-07  -8.7699  2.293e-18
as.factor(NSEASON)1 -7.716e-02  2.331e-02  -3.3108  9.482e-04
as.factor(NSEASON)2 -6.684e-02  2.398e-02  -2.7878  5.344e-03
as.factor(NSEASON)3 -1.959e-02  2.465e-02  -0.7948  4.272e-01
```

For combined results from datasets i to j, use `summary(x, subset = i:j)`.  
For separate results, use `print(summary(x), subset = i:j)`.

Figure 9: Code to fit aregImpute within the Hmisc package in R

```
1 library(Hmisc)
2 library(acepack)
3 source('http://biostat.mc.vanderbilt.edu/tmp/getLatestSource.s')
4 getLatestSource(avail=TRUE)
5 kidsplus <- read.csv("kidsplus.csv")
6 kidfact <-
7 data.frame(kidsplus$age,as.factor(kidsplus$atype),
8           as.factor(kidsplus$nseason),kidsplus$female,
9           kidsplus$los,kidsplus$routine,kidsplus$totchg,
10          as.factor(kidsplus$race),kidsplus$aweekend,kidsplus$ndx)
11 names(kidfact) <- c("AGE","ATYPE","NSEASON",
12                  "FEMALE","LOS","ROUTINE","TOTCHG","RACE","AWEKEND","NDX")
13 n <- naclus(kidfact)
14 plot(n)
15 naplot(n)
16
17 f <- aregImpute(~ ROUTINE + AGE + FEMALE + ATYPE + NSEASON + LOS +
18              TOTCHG + RACE + AWEKEND + NDX, n.impute=10, defaultLinear=TRUE,
19              data=kidfact)
20 par(mfrow=c(2,3))
21 plot(f, diagnostics=TRUE, maxn=2)
22 fmi <- fit.mult.impute(ROUTINE ~ AGE + FEMALE + ATYPE + NSEASON + LOS +
23                       TOTCHG + RACE + AWEKEND+NDX, glm, f, family="binomial",data=kidfact)
24 impse <- sqrt(diag(Varcov(fmi)))
25 fcc <- glm(ROUTINE ~ AGE + FEMALE + ATYPE + NSEASON + LOS + TOTCHG +
26           RACE + AWEKEND + NDX, family=binomial,data=kidfact)
27 summary(fmi)
28 summary(fcc)
```

Figure 10: Output from aregImpute routine within the HMisc package

```
> summary(fmi)
Call:
fitter(formula = formula, family = "binomial", data = completed.data)

Deviance Residuals:
    Min       1Q   Median       3Q      Max
-2.3491  0.4531  0.5162  0.5793  2.3334

Coefficients:
              Estimate Std. Error z value Pr(>|z|)
(Intercept)  2.737e+00  5.496e-02  49.793 < 2e-16 ***
AGE          -3.750e-02  3.014e-03 -12.443 < 2e-16 ***
FEMALE       9.931e-02  1.584e-02   6.269 3.64e-10 ***
ATYPE2       3.120e-01  1.813e-02  17.206 < 2e-16 ***
ATYPE3       3.760e-01  2.388e-02  15.743 < 2e-16 ***
NSEASON1    -6.399e-02  2.226e-02  -2.875 0.00404 **
NSEASON2    -5.019e-02  2.313e-02  -2.170 0.03002 *
NSEASON3    -4.734e-03  2.252e-02  -0.210 0.83349
LOS         -3.044e-03  7.058e-04  -4.312 1.62e-05 ***
TOTCHG      -4.510e-06  5.280e-07  -8.541 < 2e-16 ***
RACE2       -9.938e-02  2.195e-02  -4.529 5.94e-06 ***
RACE3       -1.437e-01  2.542e-02  -5.655 1.56e-08 ***
RACE4       -1.086e-01  3.476e-02  -3.125 0.00178 **
A WEEKEND   -2.030e-02  1.962e-02  -1.035 0.30077
NDX         -1.063e-01  3.723e-03 -28.553 < 2e-16 ***
---
Signif. codes:  0 *** 0.001 ** 0.01 * 0.05 . 0.1 1

(Dispersion parameter for binomial family taken to be 1)

Null deviance: 109941 on 134773 degrees of freedom
Residual deviance: 107907 on 134759 degrees of freedom
AIC: 107937

Number of Fisher Scoring iterations: 4
```

Figure 11: Plots of missing value patterns using aregImpute and the Hmisc package

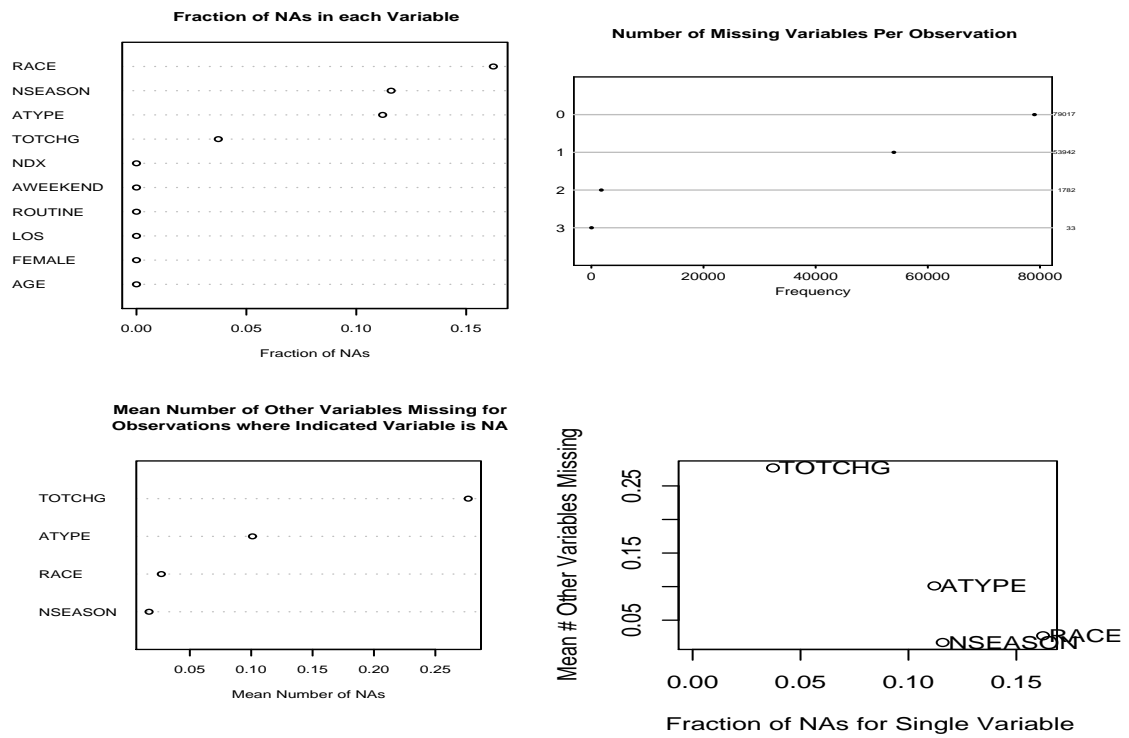

Figure 12: Code to fit ICE within Stata

```
1 ssc install ice
2 set memory 64m
3 use kidsplus, clear
4 compress
5
6 generate byte nseas1=(nseason==1)
7 generate byte nseas2=(nseason==2)
8 generate byte nseas3=(nseason==3)
9 replace nseas1=. if nseason==.
10 replace nseas2=. if nseason==.
11 replace nseas3=. if nseason==.
12
13 generate byte a2=(atype==2)
14 generate byte a3=(atype==3)
15 replace a2=. if atype==.
16 replace a3=. if atype==.
17
18 generate byte r2=(race==2)
19 generate byte r3=(race==3)
20 generate byte r4=(race==4)
21 replace r2=. if race==.
22 replace r3=. if race==.
23 replace r4=. if race==.
24 replace totchg=. if totchg==.c
25
26 capture erase imputed.dta
27
28 #delimit ;
29 ice routine age nseason nseas1 nseas2 nseas3 aweekend race
30   r2 r3 r4 female atype a2 a3 los totchg ndx using imputed,
31   m(10) cmd(nseason:mlogit, race:mlogit, atype:mlogit, totchg:regress)
32   passive(nseas1:nseason==1 \ nseas2:nseason==2 \ nseas3:nseason==3
33   \ a2:atype==2 \ a3:atype==3 \ r2:race==2 \ r3:race==3
34   \ r4:race==4) substitute(nseason:nseas1 nseas2 nseas3, race:r2 r3 r4,
35   atype:a2 a3 ) ;
36 #delimit cr
37
38 use imputed, clear
39
40 micombine logistic routine age nseas1 nseas2 nseas3 aweekend
41   r2 r3 r4 female a2 a3 los totchg ndx
```



Figure 13: Output from ICE (missing values and prediction equations)

| #missing values |  | Freq.   | Percent | Cum.   |
|-----------------|--|---------|---------|--------|
| 0               |  | 79,017  | 58.63   | 58.63  |
| 1               |  | 3,662   | 2.72    | 61.35  |
| 3               |  | 13,601  | 10.09   | 71.44  |
| 4               |  | 37,892  | 28.12   | 99.55  |
| 5               |  | 110     | 0.08    | 99.63  |
| 7               |  | 246     | 0.18    | 99.82  |
| 8               |  | 246     | 0.18    | 100.00 |
| -----           |  |         |         |        |
| Total           |  | 134,774 | 100.00  |        |

  

| Variable | Command | Prediction equation                                    |
|----------|---------|--------------------------------------------------------|
| routine  |         | [No missing data in estimation sample]                 |
| age      |         | [No missing data in estimation sample]                 |
| nseason  | mlogit  | routine age aweekend r2 r3 r4 female a2 a3 los totchg  |
|          |         | ndx                                                    |
| nseas1   |         | [Passively imputed from nseason==1]                    |
| nseas2   |         | [Passively imputed from nseason==2]                    |
| nseas3   |         | [Passively imputed from nseason==3]                    |
| aweekend |         | [No missing data in estimation sample]                 |
| race     | mlogit  | routine age nseas1 nseas2 nseas3 aweekend female a2 a3 |
|          |         | los totchg ndx                                         |
| r2       |         | [Passively imputed from race==2]                       |
| r3       |         | [Passively imputed from race==3]                       |
| r4       |         | [Passively imputed from race==4]                       |
| female   |         | [No missing data in estimation sample]                 |
| atype    | mlogit  | routine age nseas1 nseas2 nseas3 aweekend r2 r3 r4     |
|          |         | female los totchg ndx                                  |
| a2       |         | [Passively imputed from atype==2]                      |
| a3       |         | [Passively imputed from atype==3]                      |
| los      |         | [No missing data in estimation sample]                 |
| totchg   | regress | routine age nseas1 nseas2 nseas3 aweekend r2 r3 r4     |
|          |         | female a2 a3 los ndx                                   |
| ndx      |         | [No missing data in estimation sample]                 |

  

```
-----
Imputing 1..2..3..4..5..6..7..8..9..10..file imputed.dta saved
. use imputed, clear
```

Figure 14: Output from ICE (micombine)

Multiple imputation parameter estimates (10 imputations)

| routine  | Coef.     | Std. Err. | z      | P> z  | [95% Conf. Interval] |
|----------|-----------|-----------|--------|-------|----------------------|
| age      | -.0374547 | .0030187  | -12.41 | 0.000 | -.0433713 -.0315381  |
| nseas1   | -.0725107 | .0233962  | -3.10  | 0.002 | -.1183664 -.026655   |
| nseas2   | -.0569509 | .0248921  | -2.29  | 0.022 | -.1057385 -.0081633  |
| nseas3   | -.0046107 | .0252203  | -0.18  | 0.855 | -.0540415 .0448202   |
| aweekend | -.0201544 | .0196609  | -1.03  | 0.305 | -.0586891 .0183802   |
| r2       | -.0821431 | .0239809  | -3.43  | 0.001 | -.1291449 -.0351413  |
| r3       | -.1457935 | .0272348  | -5.35  | 0.000 | -.1991726 -.0924143  |
| r4       | -.1024608 | .035986   | -2.85  | 0.004 | -.172992 -.0319295   |
| female   | .0993698  | .015858   | 6.27   | 0.000 | .0682886 .130451     |
| a2       | .3109377  | .0205179  | 15.15  | 0.000 | .2707234 .351152     |
| a3       | .3816381  | .0267408  | 14.27  | 0.000 | .329227 .4340491     |
| los      | -.0032354 | .0007087  | -4.57  | 0.000 | -.0046245 -.0018463  |
| totchg   | -4.34e-06 | 5.36e-07  | -8.10  | 0.000 | -5.40e-06 -3.29e-06  |
| ndx      | -.1061707 | .0037324  | -28.45 | 0.000 | -.1134862 -.0988553  |
| _cons    | 2.735714  | .0558411  | 48.99  | 0.000 | 2.626267 2.84516     |

134774 observations.

Figure 15: Code to fit iveWare

```
kid.sas:
1  options set = SRCLIB "." sasautos = ('!SRCLIB' sasautos)
2  mautosource;
3
4  options ls=80 nocenter;
5
6  libname mylib '.';
7  libname kid '..';
8  data one; set kid.kidsplus;
9      routine = 1-routine;
10 run;
11 %regress(name=mysetup,dir=.);
12 run;
```

```
mysetup.set:
1  datain work.one;
2  mdata impute;
3  iterations 10;
4  multiples 10;
5  seed 42;
6  estout mylib.est;
7  repout mylib.rep;
8  link logistic;
9  categorical atype nseason race;
10 dependent routine;
11 predictor age female los totchg ndx aweekend;
12 estimates
13     race1: race (1) /
14     race2: race (0 1) /
15     race3: race (0 0 1) /
16     atype1: atype (1) /
17     atype2: atype (0 1) /
18     nseason1: nseason (1) /
19     nseason2: nseason (0 1) /
20     nseason3: nseason (0 0 1);
21 print details;
22 run;
```

Figure 16: Output of iveWare

(Results from separate imputations pruned)

All imputations

|              |             |
|--------------|-------------|
| Valid cases  | 134774      |
| Degr freedom | 39.24283948 |
| -2 LogLike   | 107917.8379 |

| Variable  | Estimate   | Std Error | Wald test  | Prob > Chi |
|-----------|------------|-----------|------------|------------|
| Intercept | 3.0025395  | 0.0681594 | 1940.55546 | 0.00000    |
| AGE       | -0.0375023 | 0.0030186 | 154.34713  | 0.00000    |
| FEMALE    | 0.0997349  | 0.0158474 | 39.60739   | 0.00000    |
| LOS       | -0.0032319 | 0.0007054 | 20.98991   | 0.00000    |
| TOTCHG    | -0.0000043 | 0.0000005 | 66.43989   | 0.00000    |
| NDX       | -0.1063283 | 0.0037271 | 813.88402  | 0.00000    |
| AWEEKEND  | -0.0208605 | 0.0196453 | 1.12754    | 0.28830    |
| RACE.1    | 0.1074252  | 0.0374141 | 8.24409    | 0.00409    |
| RACE.2    | 0.0197358  | 0.0413594 | 0.22770    | 0.63324    |
| RACE.3    | -0.0443307 | 0.0438037 | 1.02421    | 0.31152    |
| ATYPE.1   | -0.3768551 | 0.0251527 | 224.48145  | 0.00000    |
| ATYPE.2   | -0.0697954 | 0.0268183 | 6.77318    | 0.00925    |
| NSEASON.0 | 0.0076150  | 0.0236622 | 0.10357    | 0.74759    |
| NSEASON.1 | -0.0635770 | 0.0225465 | 7.95137    | 0.00481    |
| NSEASON.2 | -0.0515117 | 0.0229675 | 5.03018    | 0.02491    |

Figure 17: Screenshot from LogXact

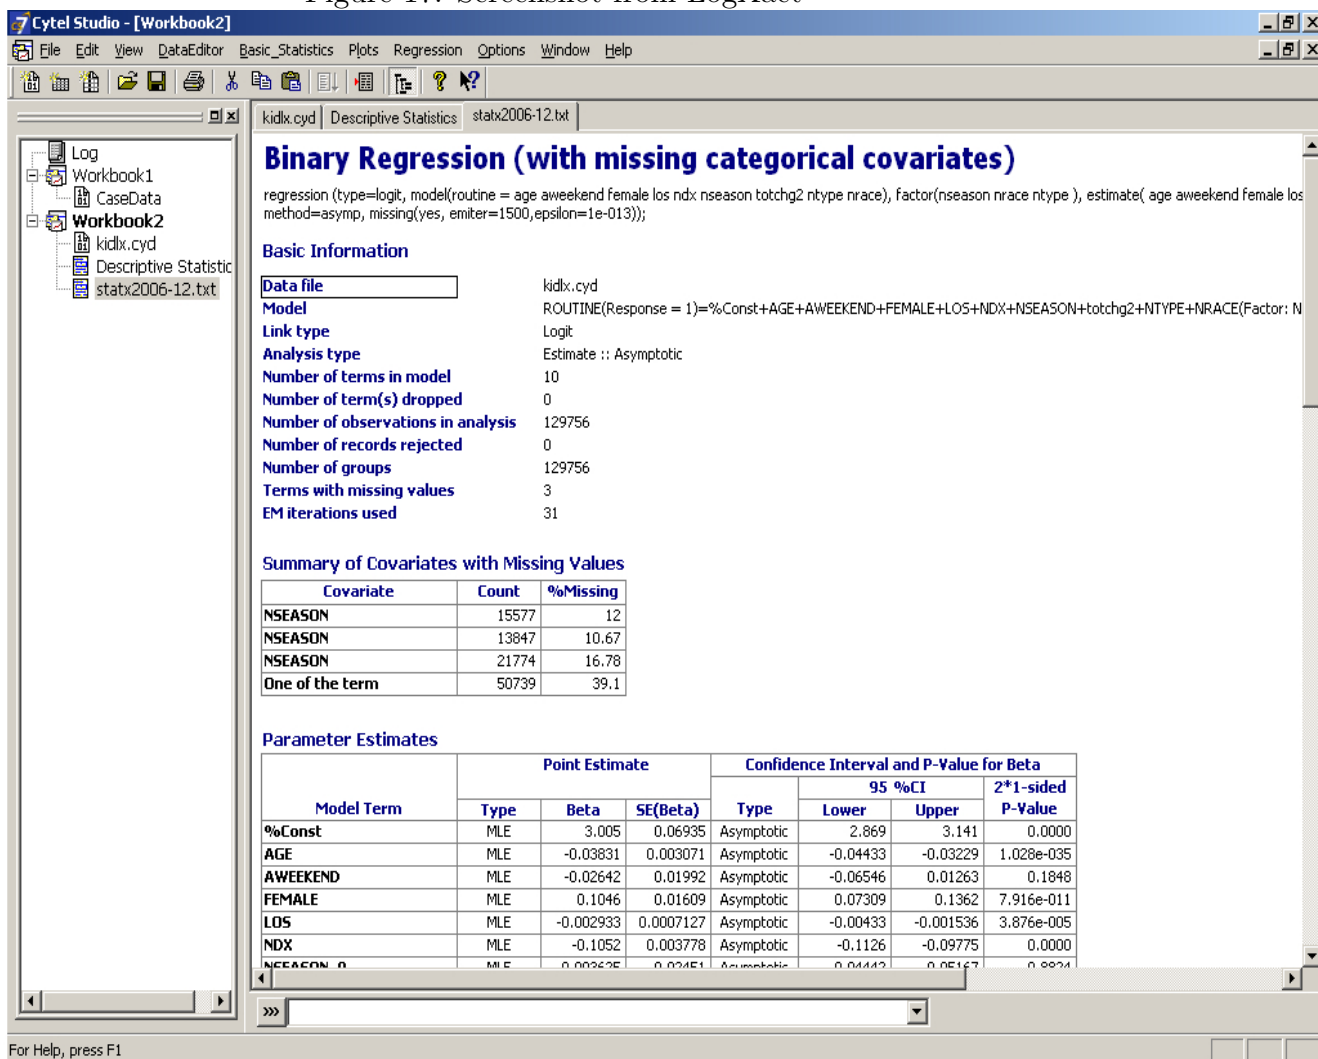

Figure 18: Code to fit MICE within R

```
1 library(mice)
2 source("patch1.14.R")
3 kidsplus <- read.csv("kidsplus.csv")
4 kidfact <- data.frame(kidsplus$age,as.factor(kidsplus$atype),
5   as.factor(kidsplus$nseason),kidsplus$female,kidsplus$los,
6   kidsplus$routine,kidsplus$totchg,as.factor(kidsplus$race),
7   kidsplus$aweekend,kidsplus$ndx)
8 names(kidfact) <- c("AGE","ATYPE","NSEASON","FEMALE",
9   "LOS","ROUTINE","TOTCHG","RACE","A WEEKEND","NDX")
10 imp <- mice(kidfact,im=c("","polyreg","polyreg","","",""),
11   "norm","polyreg","",""),m=10,seed=456)
12 fit <- glm.mids(ROUTINE ~ AGE + FEMALE + ATYPE + NSEASON +
13   LOS + TOTCHG + RACE + A WEEKEND + NDX, family=binomial, data=imp)
14 result <- pool(fit)
15 fitcc <- glm(ROUTINE ~ AGE + FEMALE + ATYPE + NSEASON + LOS +
16   TOTCHG + RACE + A WEEKEND + NDX, family=binomial, data=kidfact)
```

Figure 19: Output from MICE (lower and upper 95% CI pruned)

```

> summary(result)

```

|             | est           | se           | t           | df          |
|-------------|---------------|--------------|-------------|-------------|
| (Intercept) | 2.737864e+00  | 5.573048e-02 | 49.1268757  | 12724.5089  |
| AGE         | -3.749941e-02 | 3.016851e-03 | -12.4299863 | 131963.1081 |
| FEMALE      | 9.967850e-02  | 1.585490e-02 | 6.2869210   | 127425.0757 |
| ATYPE2      | 3.065392e-01  | 1.937845e-02 | 15.8185626  | 639.9450    |
| ATYPE3      | 3.772982e-01  | 2.468176e-02 | 15.2865201  | 1700.4235   |
| NSEASON1    | -7.167735e-02 | 2.377789e-02 | -3.0144540  | 575.4299    |
| NSEASON2    | -5.323242e-02 | 2.433102e-02 | -2.1878418  | 952.7860    |
| NSEASON3    | -6.745087e-03 | 2.461794e-02 | -0.2739908  | 352.6997    |
| LOS         | -3.237787e-03 | 7.064497e-04 | -4.5831818  | 36101.4192  |
| TOTCHG      | -4.339639e-06 | 5.321358e-07 | -8.1551359  | 9218.3157   |
| RACE2       | -8.378841e-02 | 2.347370e-02 | -3.5694588  | 621.0766    |
| RACE3       | -1.437074e-01 | 2.800739e-02 | -5.1310544  | 296.0473    |
| RACE4       | -1.039486e-01 | 3.726879e-02 | -2.7891605  | 487.0386    |
| AWEEKEND    | -2.083815e-02 | 1.963036e-02 | -1.0615267  | 133735.5810 |
| NDX         | -1.061728e-01 | 3.726475e-03 | -28.4914839 | 130256.5639 |

  

|             | Pr(> t )     | missing | fmi          |
|-------------|--------------|---------|--------------|
| (Intercept) | 0.000000e+00 | NA      | 0.0252771848 |
| AGE         | 0.000000e+00 | 0       | 0.0011595282 |
| FEMALE      | 3.248677e-10 | 0       | 0.0019303935 |
| ATYPE2      | 0.000000e+00 | NA      | 0.1182741633 |
| ATYPE3      | 0.000000e+00 | NA      | 0.0722584557 |
| NSEASON1    | 2.687842e-03 | NA      | 0.1247599341 |
| NSEASON2    | 2.892344e-02 | NA      | 0.0968126464 |
| NSEASON3    | 7.842521e-01 | NA      | 0.1594965626 |
| LOS         | 4.594857e-06 | 0       | 0.0134789554 |
| TOTCHG      | 4.440892e-16 | 5018    | 0.0301271524 |
| RACE2       | 3.853390e-04 | NA      | 0.1200662185 |
| RACE3       | 5.222446e-07 | NA      | 0.1741291410 |
| RACE4       | 5.491480e-03 | NA      | 0.1356565986 |
| AWEEKEND    | 2.884525e-01 | 0       | 0.0006851676 |
| NDX         | 0.000000e+00 | 0       | 0.0014892814 |

Figure 20: Description of code to fit missing data models within SAS PROC/MI using two step imputation

```

1   proc mi nimpute=20 data = tc out = tci;
2       class aweekend female ;
3       var los age ndx routine aweekend female totchg;
4       monotone reg;
5   run;
6   proc print data = tci (obs = 10); run;
7   data back1; set tci rem1 (in = dups);
8       impnum = 20;
9       if dups then do i = 1 to impnum;
10          _imputation_ = i; output;
11      end;
12      else output;
13  run;
14
15  data patts; set back1;
16  misspatt = ((newatype eq .) + 1) + 10 * ((race eq .) + 1) + 100 * ((nseason eq .) + 1);
17  run;
18
19  proc freq data = patts;
20      tables misspatt;
21  run;
22
23  proc sort data = patts; by _imputation_; run;
24  data k.patts; set patts; run;
25
26  proc mi nimpute=1 data = patts out = i_srt;
27      where misspatt = 111 or misspatt = 112 or misspatt = 122;
28      by _imputation_;
29      class routine aweekend female nseason race newatype;
30      var los age ndx totchg routine aweekend female nseason race newatype;
31      monotone propensity (/ngroups = 20) ;
32  run;
33  proc mi nimpute=1 data = patts out = i_tsr;
34      where misspatt = 111 or misspatt = 121 or misspatt = 221;
35      by _imputation_;
36      class routine aweekend female newatype nseason race;
37      var los age ndx totchg routine aweekend female newatype nseason race;
38      monotone discrim ;
39  run;
40  proc mi nimpute=1 data = patts out = i_rts;
41      where misspatt = 111 or misspatt = 211 or misspatt = 212;
42      by _imputation_;
43      class aweekend female race newatype nseason;
44      var los age ndx routine aweekend female totchg race newatype nseason;
45      monotone discrim ;
46  run;
47
48  data mis; set i_srt i_tsr i_rts;
49      where misspatt ne 111;
50  run;
51
52  data k.whole; set patts (where = (misspatt eq 111)) mis; run;
53
54  proc sort data = k.whole; by _imputation_; run;
55
56  proc logistic data = k.whole descending ;
57      by _imputation_;
58      class routine race aweekend nseason female newatype/param = glm;
59      model routine = age race aweekend nseason female newatype los totchg ndx/covb;
60      ods output ParameterEstimates=kidsparms CovB=kidsscovb;
61  run;
62
63  proc print data = kidsscovb (obs = 2); run;
64  proc print data = kidsparms (obs = 20); run;
65
66  data kp2; set kidsparms; if df ne 0;
67  if classval0 ne '' then variable = compress(variable||classval0);
68  run;
69
70  proc print data = kp2 (obs = 20); run;
71
72  proc mianalyze parms=kp2
73      covb(effectvar=stacking)=kidsscovb;
74      modeleffects Intercept age race1 race2 race3 aweekend0 nseason1
75      nseason2 nseason3 female0 newatype1 newatype2 los totchg ndx;
76  run;

```



Figure 21: Output from SAS PROC MI using two stage imputation

The MIANALYZE Procedure Model Information

PARMS Data Set WORK.KP2  
 COVB Data Set WORK.KIDSSCO  
 Number of Imputations 20

Multiple Imputation Variance Information

| Parameter | Variance     |              |              | DF     | Relative | Fraction | Relative |
|-----------|--------------|--------------|--------------|--------|----------|----------|----------|
|           | Between      | Within       | Total        |        | Increase | Missing  |          |
| Intercept | 0.000461     | 0.005616     | 0.006100     | 3014.1 | 0.086243 | 0.080006 | 0.996016 |
| age       | 1.3318326E-8 | 0.000010474  | 0.000010488  | 1.07E7 | 0.001335 | 0.001334 | 0.999933 |
| race1     | 0.000348     | 0.001466     | 0.001832     | 476.59 | 0.249477 | 0.203003 | 0.989952 |
| race2     | 0.000407     | 0.001793     | 0.002220     | 512.86 | 0.238353 | 0.195607 | 0.990314 |
| race3     | 0.000479     | 0.002157     | 0.002660     | 531.39 | 0.233185 | 0.192126 | 0.990485 |
| aweekend0 | 4.4236506E-8 | 0.000449     | 0.000449     | 1.78E9 | 0.000103 | 0.000103 | 0.999995 |
| nseason1  | 0.000104     | 0.000587     | 0.000697     | 770.49 | 0.186287 | 0.159213 | 0.992102 |
| nseason2  | 0.000098719  | 0.000538     | 0.000642     | 728.92 | 0.192535 | 0.163741 | 0.991879 |
| nseason3  | 0.000055963  | 0.000589     | 0.000647     | 2305.4 | 0.099847 | 0.091571 | 0.995442 |
| female0   | 5.4249308E-8 | 0.000291     | 0.000291     | 4.95E8 | 0.000196 | 0.000196 | 0.999990 |
| newatype1 | 0.000000140  | 0.000655     | 0.000655     | 3.76E8 | 0.000225 | 0.000225 | 0.999989 |
| newatype2 | 0.000000124  | 0.000773     | 0.000773     | 6.75E8 | 0.000168 | 0.000168 | 0.999992 |
| los       | 4.6712575E-9 | 0.000000602  | 0.000000607  | 291101 | 0.008145 | 0.008086 | 0.999596 |
| totchg    | 5.184886E-15 | 4.031789E-13 | 4.086231E-13 | 107039 | 0.013503 | 0.013342 | 0.999333 |
| ndx       | 1.5385562E-8 | 0.000016604  | 0.000016620  | 2.01E7 | 0.000973 | 0.000972 | 0.999951 |

Multiple Imputation Parameter Estimates

| Parameter | Estimate     | Std Error   | 95% Confidence Limits |          | DF     | Minimum   | Maximum   |
|-----------|--------------|-------------|-----------------------|----------|--------|-----------|-----------|
| Intercept | 3.104038     | 0.078103    | 2.95090               | 3.25718  | 3014.1 | 3.073192  | 3.152175  |
| age       | -0.036523    | 0.003239    | -0.04287              | -0.03018 | 1.07E7 | -0.036751 | -0.036304 |
| race1     | 0.110903     | 0.042798    | 0.02681               | 0.19500  | 476.59 | 0.073480  | 0.137640  |
| race2     | 0.042818     | 0.047118    | -0.04975              | 0.13539  | 512.86 | -0.004068 | 0.071938  |
| race3     | -0.070233    | 0.051579    | -0.17156              | 0.03109  | 531.39 | -0.130730 | -0.043424 |
| aweekend0 | 0.036344     | 0.021197    | -0.00520              | 0.07789  | 1.78E9 | 0.036047  | 0.037051  |
| nseason1  | -0.011170    | 0.026393    | -0.06298              | 0.04064  | 770.49 | -0.029910 | 0.007638  |
| nseason2  | -0.072749    | 0.025338    | -0.12249              | -0.02300 | 728.92 | -0.091803 | -0.057172 |
| nseason3  | -0.052218    | 0.025442    | -0.10211              | -0.00233 | 2305.4 | -0.064840 | -0.039615 |
| female0   | -0.118519    | 0.017052    | -0.15194              | -0.08510 | 4.95E8 | -0.119095 | -0.118150 |
| newatype1 | -0.378938    | 0.025594    | -0.42910              | -0.32877 | 3.76E8 | -0.379799 | -0.378393 |
| newatype2 | -0.066875    | 0.027804    | -0.12137              | -0.01238 | 6.75E8 | -0.067662 | -0.066197 |
| los       | -0.003867    | 0.000779    | -0.00539              | -0.00234 | 291101 | -0.003961 | -0.003719 |
| totchg    | -0.000003171 | 0.000000639 | -0.00000              | -0.00000 | 107039 | -0.000003 | -0.000003 |
| ndx       | -0.111112    | 0.004077    | -0.11910              | -0.10312 | 2.01E7 | -0.111329 | -0.110907 |

Figure 22: Description of code to fit models within S-Plus missing data library

```
1 library(missing)
2 options(contrasts=c("contr.treatment", "contr.poly"))
3 margins.form <- ~ ATYPE + NSEASON + RACE + A WEEKEND + ROUTINE + FEMALE +
4   ATYPE*NSEASON + ATYPE+RACE + ATYPE*A WEEKEND + ATYPE*ROUTINE + ATYPE*FEMALE +
5   NSEASON*RACE + NSEASON*A WEEKEND + NSEASON*ROUTINE + NSEASON*FEMALE +
6   RACE*A WEEKEND + RACE*ROUTINE + RACE*FEMALE +
7   A WEEKEND*ROUTINE + A WEEKEND*FEMALE + ROUTINE*FEMALE
8 kidfact <- data.frame(kidsplus$age,as.factor(kidsplus$atype),
9   as.factor(kidsplus$nseason),as.factor(kidsplus$female),
10  kidsplus$los,as.factor(kidsplus$routine),
11  kidsplus$totchg,as.factor(kidsplus$race),
12  as.factor(kidsplus$awekend),kidsplus$ndx)
13 names(kidfact) <- c("AGE","ATYPE","NSEASON","FEMALE","LOS","ROUTINE","TOTCHG",
14  "RACE","A WEEKEND","NDX")
15 ccglm <- glm(ROUTINE ~ AGE + ATYPE + A WEEKEND + FEMALE + LOS + NDX +
16  RACE + TOTCHG + NSEASON, na.action=na.omit,
17  family=binomial, data=kidfact)
18 kidcgm <- preCgm(kidfact)
19 kid.em <- emCgm(kidcgm, margins=margins.form, design = margins.form, prior=1.05)
20 dataDepend <- dataDepPrior(kidcgm, nPriorObs=50, algorithm="da")
21 impout <- impCgm(kid.em,nimpute=10)
22 impout1 <- miSubscript(impout, 1)
23 impglm <- miEval(glm(ROUTINE ~ AGE + ATYPE + A WEEKEND + FEMALE + LOS +
24  NDX + RACE + TOTCHG + NSEASON,
25  family=binomial, data=impout, subset =
26  !is.infinite(impout1$TOTCHG)))
27 sumfit <- miEval(summary(impglm))
28 coefs <- miEval(coef(sumfit))
29 results <- miMeanSE(miEval(coefs[, 1]), miEval(coefs[, 2]))
```

Figure 23: Description of output from S-Plus missing data library

```

> results
$est:
(Intercept)      AGE      ATYPE2      ATYPE3      A WEEKEND      FEMALE
  2.734479 -0.03740613  0.3137568  0.3822975 -0.01846629  0.09821091
      LOS      NDX      RACE2      RACE3      RACE4      TOTCHG
-0.003195076 -0.1059842 -0.07862305 -0.1493073 -0.1029841 -4.403978e-06
  NSEASON2  NSEASON3  NSEASON4
-0.07259462 -0.0558042 -0.009378634

$std.err:
(Intercept)      AGE      ATYPE2      ATYPE3      A WEEKEND      FEMALE
  0.05553486 0.003019782 0.02081542 0.02508927 0.01964768 0.01585714
      LOS      NDX      RACE2      RACE3      RACE4      TOTCHG
0.0007103084 0.003731087 0.02261825 0.02705698 0.03702192 5.385703e-07
  NSEASON2  NSEASON3  NSEASON4
0.02408424 0.02415537 0.0246976

$df:
(Intercept) AGE ATYPE2 ATYPE3 A WEEKEND FEMALE LOS NDX RACE2 RACE3 RACE4
      NA  NA      NA      NA      NA      NA  NA  NA      NA      NA      NA
TOTCHG NSEASON2 NSEASON3 NSEASON4
      NA      NA      NA      NA

$m:
[1] 10

$r:
(Intercept)      AGE      ATYPE2      ATYPE3      A WEEKEND      FEMALE      LOS
  0.0188569 0.002802194 0.3168717 0.1091718 0.001285257 0.001589901 0.0211495
      NDX      RACE2      RACE3      RACE4      TOTCHG  NSEASON2  NSEASON3
0.003671249 0.05358623 0.1336732 0.1393954 0.05036733 0.1706005 0.08983401
  NSEASON4
0.1968896

$fminf:
(Intercept)      AGE      ATYPE2      ATYPE3      A WEEKEND      FEMALE      LOS
  0.01858261 0.002796094 0.2502102 0.1003611 0.001283973 0.001587936 0.0208048
      NDX      RACE2      RACE3      RACE4      TOTCHG  NSEASON2  NSEASON3
0.003660782 0.05140594 0.1206243 0.1252462 0.04843821 0.1497413 0.08381139
  NSEASON4
0.1694804

```
